# Supplementary material
Source: publisher figshare collection journal article supplement (https://springernature.figshare.com/ndownloader/files/13512317)
Supplement: Supplementary file 1 [file 13512317]

Table S1. Results of the proportional hazards assumption by a Schoenfeld residuals test

|  | p-value |
| --- | --- |
| Age | <0.001 |
| Older age | 0.089 |
| Sex (male) | 0.32 |
| Etiology of ESRD  DN  NS  CGN  ADPKD  IgAN  Other or unknown | 0.083  0.49  0.68  -  0.67  0.28 |
| Smoking history | 0.62 |
| DM | 0.62 |
| Dyslipidemia | 0.14 |
| CVD  IHD  CHF  stroke | 0.77  0.70  0.77  0.94 |
| PAD | 0.30 |
| RASI | 0.50 |
| Statin | 0.19 |
| Warfarin | 0.61 |
| Antiplatelet agents | 0.13 |
| AVF anastomosis type (%)  Radiocephalic  Brachiocephalic | 0.070  0.080 |

We defined individuals aged >71 years as “the older age.”

ESRD, end-stage renal disease; DN, diabetic nephropathy; NS, nephrosclerosis; CGN, chronic glomerulonephritis; ADPKD, autosomal dominant polycystic kidney disease; IgAN, IgA nephropathy; DM, diabetes mellitus; CVD, cardiovascular disease; IHD, ischemic heart disease; CHF, congestive heart failure; PAD, peripheral artery disease; RASI, renin-angiotensin–aldosterone-system inhibitor; AVF, arteriovenous fistula
